# Supplementary material for: Thermal, chemical and morphological properties of carbon fibres derived from chemically pre-treated wool fibres
Source: Royal Society of Chemistry journal article supplement (doi:10.1039/c5ra10649d), 2015-01-01
Supplement: c5ra10649d1.pdf [file c5ra10649d1.pdf]

## **Thermal, chemical and morphological properties of carbon fibres derived from chemically pre-treated wool fibres**

Mohammad Mahbubul Hassan,<sup>\*,a</sup> Linda Schiermeister<sup>b</sup> and Mark Peter Staiger<sup>b,c</sup>

RSC Advances 2015

### **Py-GC-MS analysis of volatiles evolved during pyrolysis of wool fibre at 300 to 400 °C and 400 to 600 °C.**

#### **Py-GC-MS Procedure**

Approximately 1 mg of wool fibre was placed with clean tweezers into a quartz pyrolysis tube (CDS Analytical, pre-cleaned by heating at 800 °C) plugged with deactivated quartz wool. Pyrolysis was performed using a CDS Analytical Pyroprobe 5250. The sample was pyrolysed in a helium atmosphere with a temperature programme increasing from 300 to 400 °C at 10 °C/min. Products flowed through a transfer line (with He as the carrier gas) into an Agilent HP 6890 GC coupled to an Agilent HP 5973 MSD. The GC column was an Agilent DB5-MSI (60m long, 0.25 mm I.D., 0.25 µm film thickness). The GC oven was held at -40 °C for 12 minutes after the pyrolysis temperature programme started to cryogenically focus the products onto the column. GC oven temperature was then increased to 40 °C at 8 °C/min, then to 310 °C at 4 °C/min, then held at 310 °C for 5 minutes. Helium was used as the carrier gas at a constant flow rate of 1.2 mL/min. The split ratio was 30:1. Mass spectra were acquired in full scan mode ( $m/z$  15 to 600) with ionisation energy of 70 eV. Once the pyrolysis temperature programme had completed, the sample was ejected from the pyrolysis unit and immediately sealed in a glass vial to limit exposure to atmosphere. The procedure above was repeated on the sample, with a pyrolysis temperature program increased from 400 to 600 °C at 10 °C/min. The GC oven was held at -40 °C for 22 minutes to cryogenically focus products, and held at the final temperature of 310 °C for 25 minutes. All other experimental parameters were identical.

#### **Results**

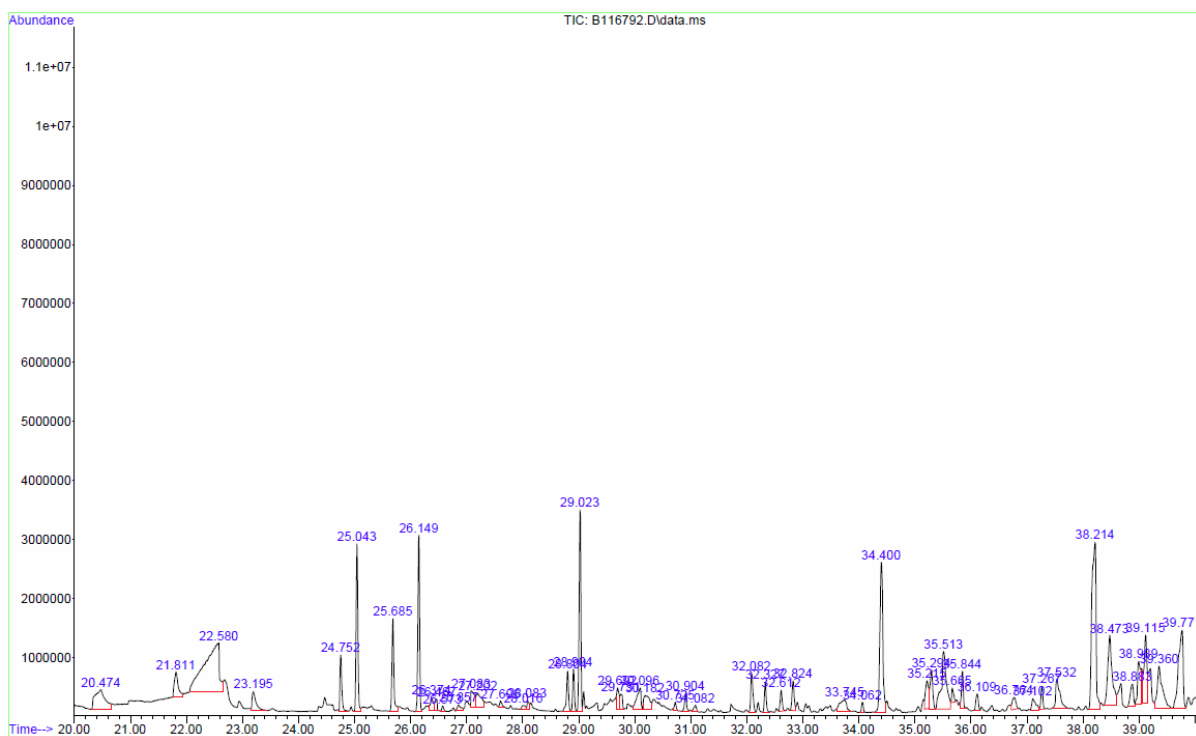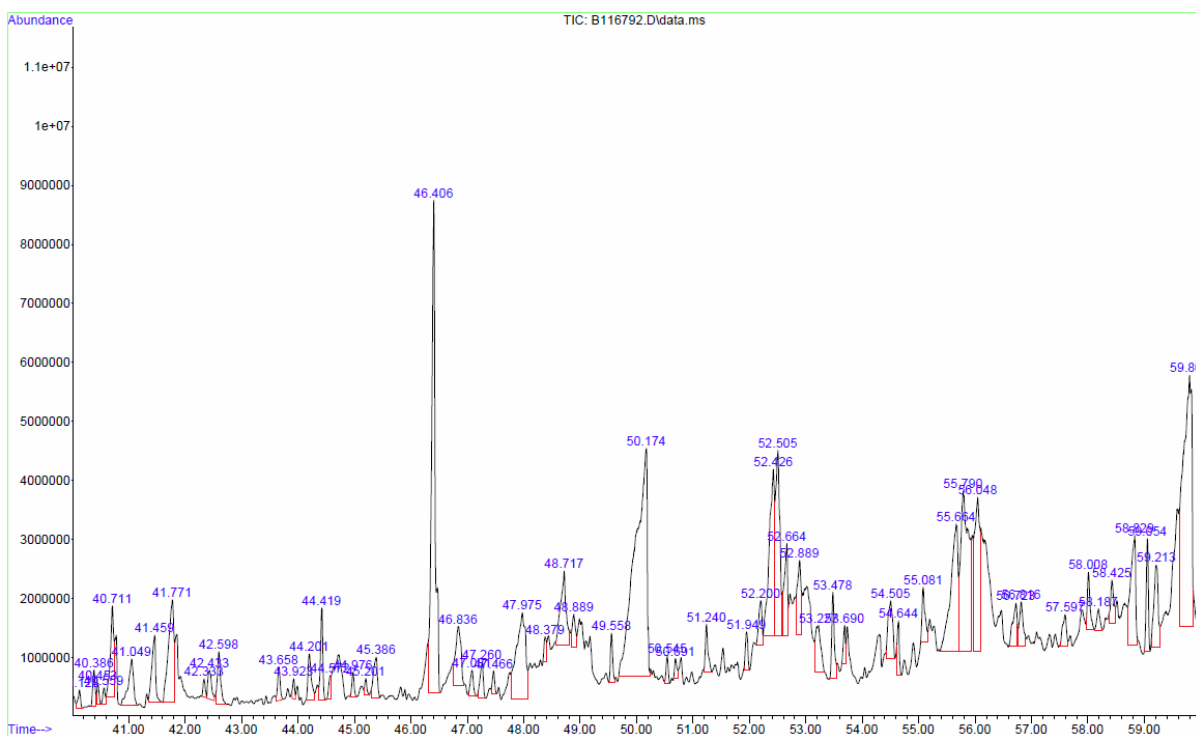

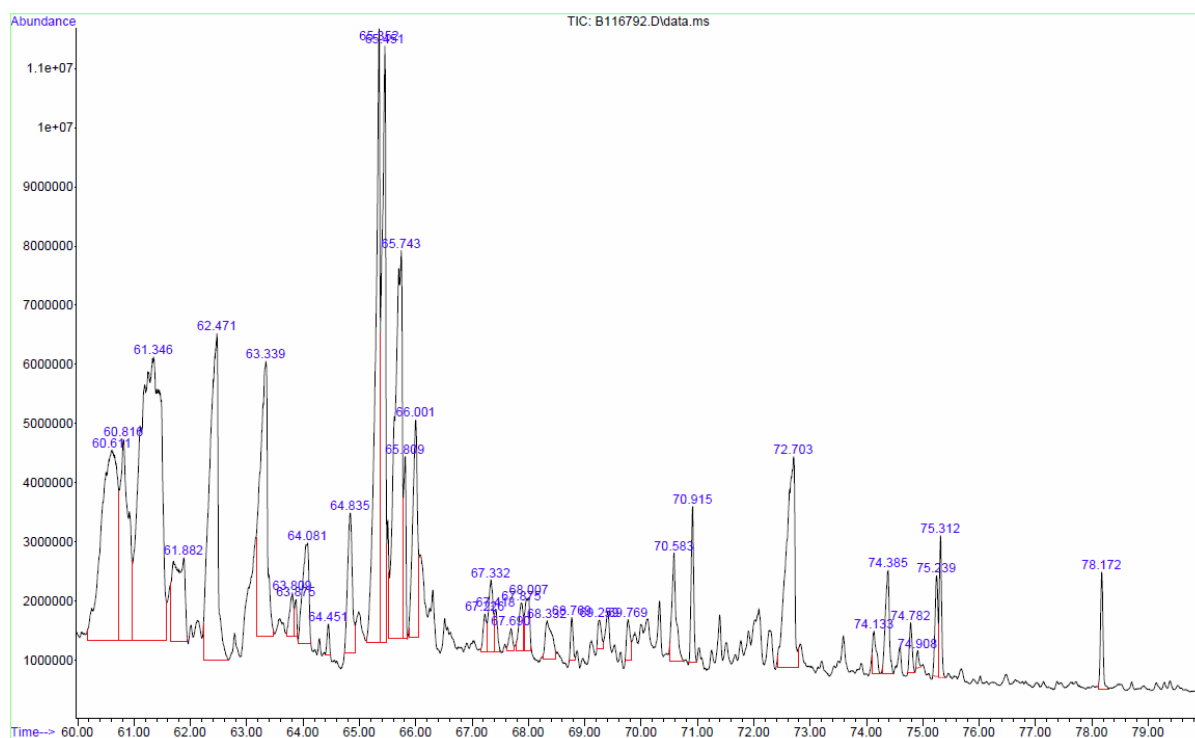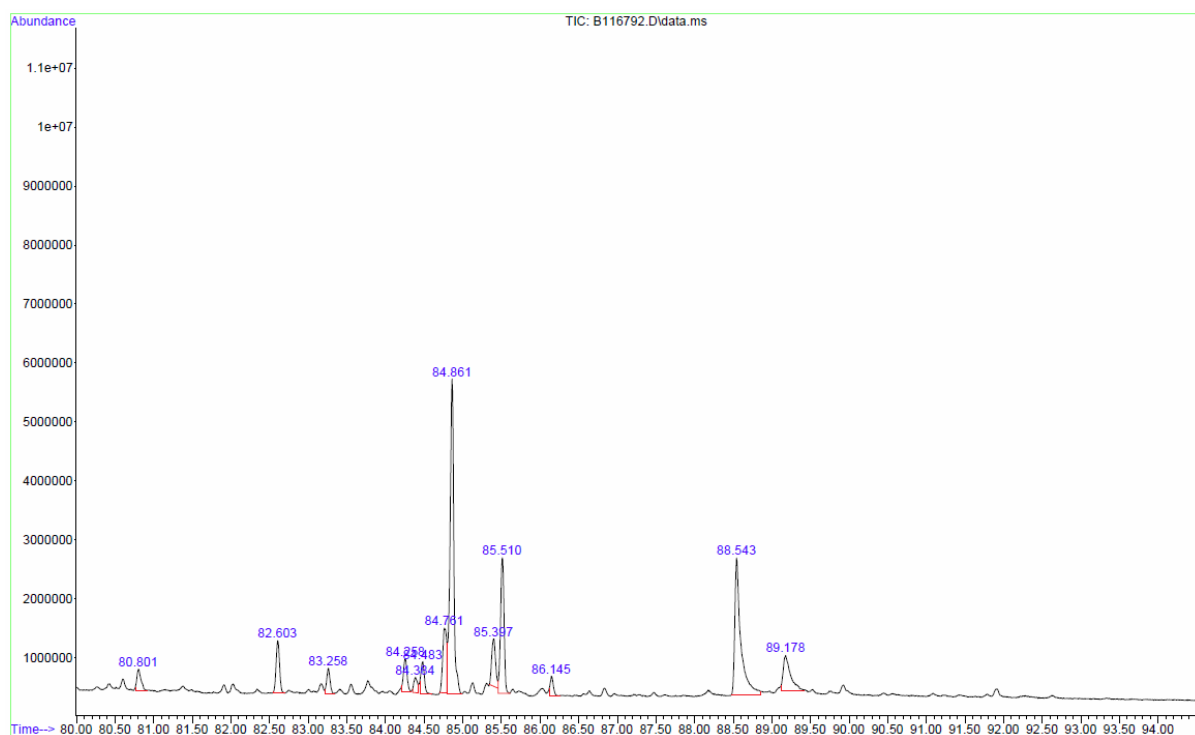

**Figure S1. Pyrochromatogram of wool fibre pyrolysed at 300-400 °C at 10 °C/min under helium atmosphere.**

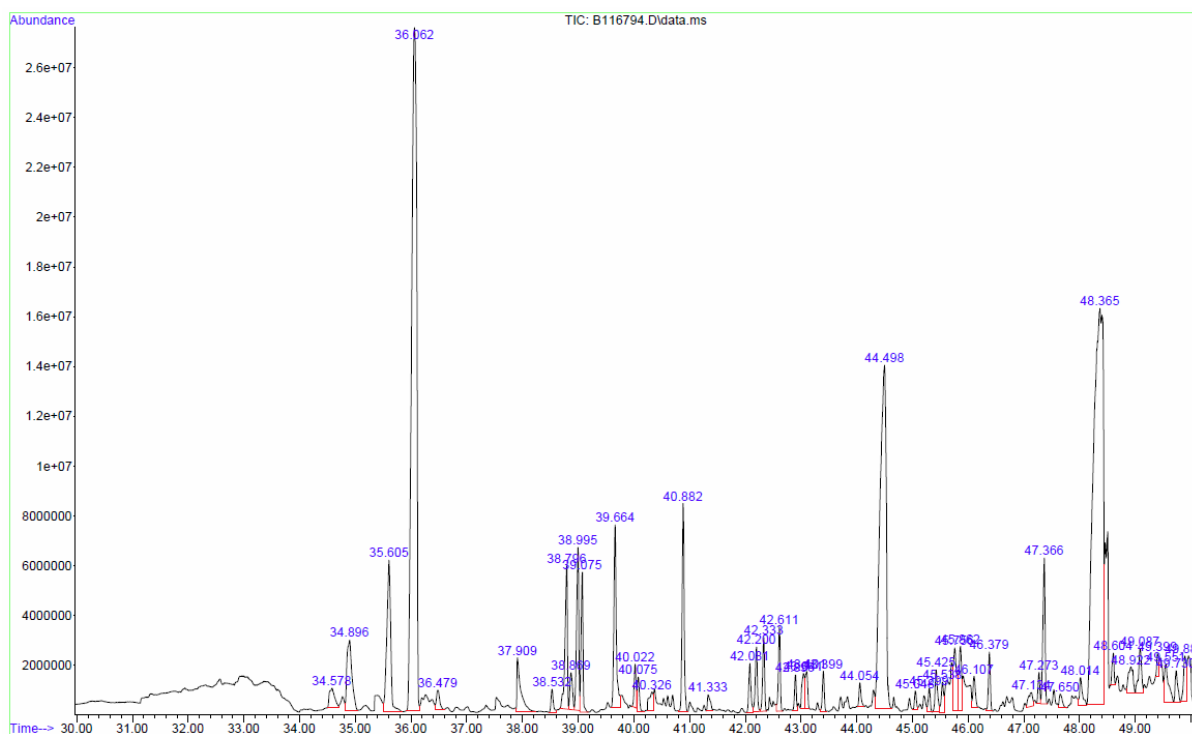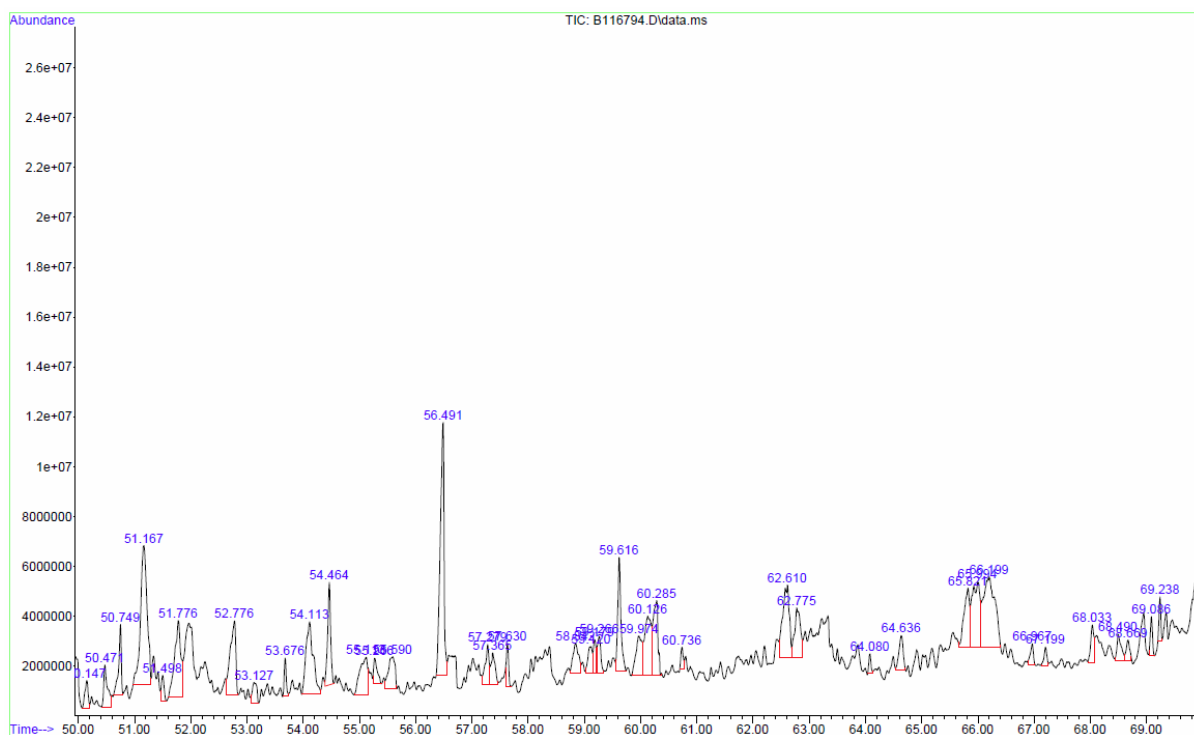

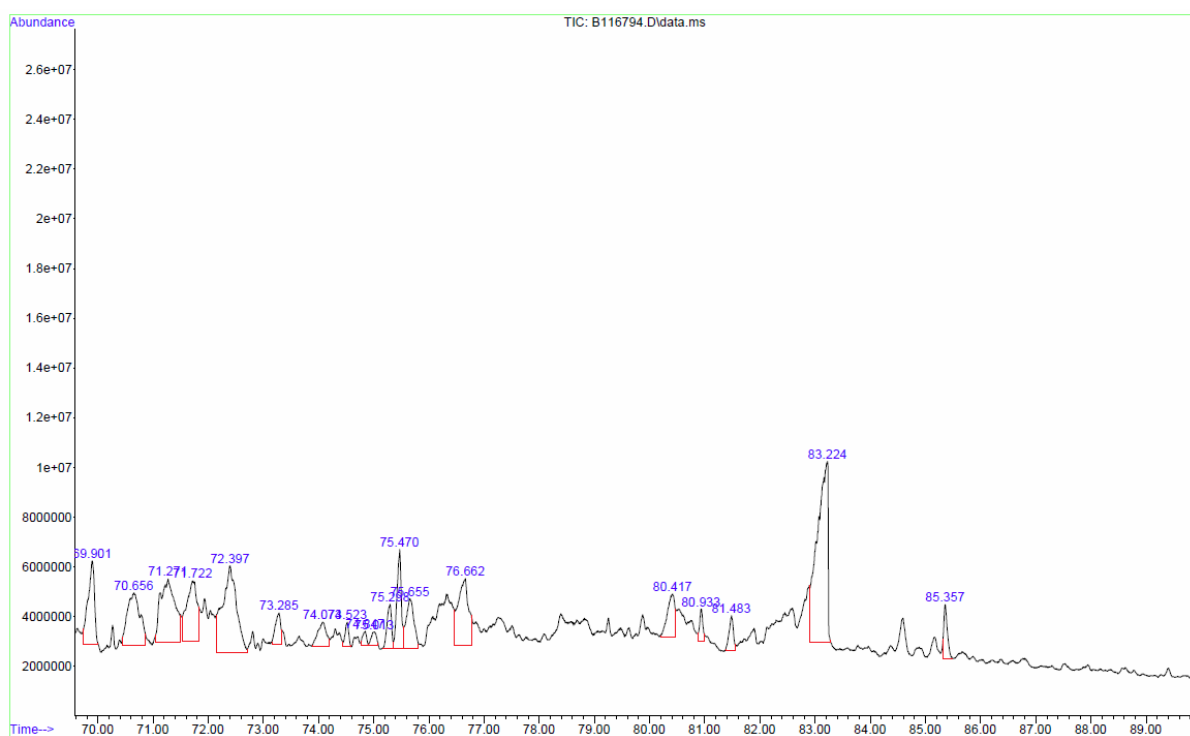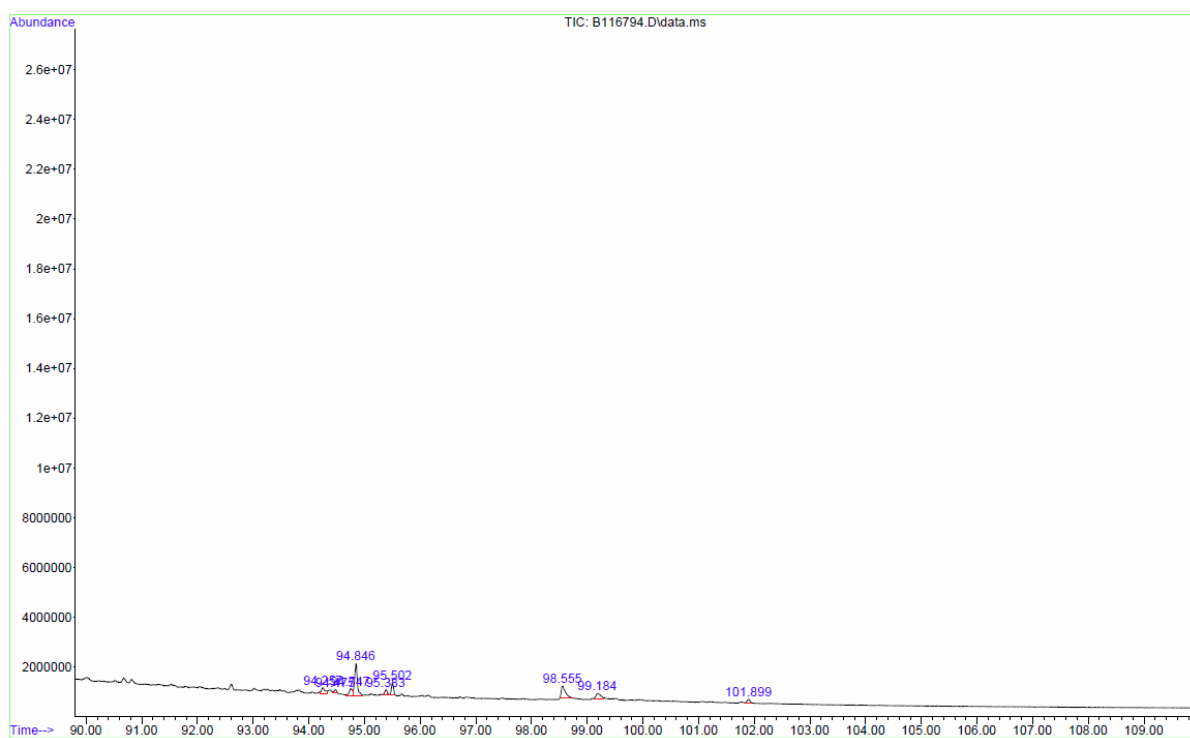

**Figure S2. Pyrochromatogram of wool fibre pyrolysed at 400-600 °C at 10 °C/min under helium atmosphere.**

**Table S1.** Retention time and the percentage of peak areas of the pyrolysis products obtained from wool fibre at 300 to 400 °C.

| Retention time (min) | Compounds                               | % of peak area |
|----------------------|-----------------------------------------|----------------|
| 20.474               | Propanenitrile                          | 0.32           |
| 21.811               | Isobutyronitrile                        | 0.14           |
| 22.58                | Acetic acid                             | 1.18           |
| 23.195               | Butanenitrile                           | 0.12           |
| 24.752               | 2-methyl butanenitrile                  | 0.17           |
| 25.043               | 3-methyl butanenitrile                  | 0.48           |
| 25.685               | Pyrrole                                 | 0.28           |
| 26.149               | Toluene                                 | 0.49           |
| 27.083               | Acetamide                               | 0.10           |
| 28.804               | 2-methyl 1H-pyrrole                     | 0.13           |
| 29.023               | 4-methyl pentanenitrile                 | 0.56           |
| 30.096               | 2-methyl butanoic acid                  | 0.14           |
| 30.182               | Propanamide                             | 0.13           |
| 32.082               | Dimethyl 1H-pyrrole                     | 0.14           |
| 32.824               | 3-buten-2-ol                            | 0.10           |
| 33.745               | 4-methyl pentanoic acid                 | 0.13           |
| 34.4                 | Phenol                                  | 0.72           |
| 35.215               | Methyl butanamide                       | 0.14           |
| 35.294               | Methyl butanamide                       | 0.15           |
| 35.513               | Aminopyridine                           | 0.47           |
| 35.844               | Trimethylpyrrole                        | 0.1            |
| 37.532               | Amino methylpyridine                    | 0.2            |
| 38.214               | 4-methyl phenol                         | 1.12           |
| 38.473               | Imidazole-4-carboxamide                 | 0.48           |
| 38.989               | 3-methyl 2-pyridinamine                 | 0.21           |
| 39.115               | Unknown                                 | 0.32           |
| 39.36                | 3-methyl butanamide                     | 0.34           |
| 39.771               | Pentanamide                             | 0.58           |
| 40.387               | Unknown                                 | 0.14           |
| 40.711               | Benzyl nitrile                          | 0.48           |
| 41.459               | 2,6-piperidinedione                     | 0.41           |
| 41.771               | Dimethyl pyrrole dione                  | 0.92           |
| 42.433               | 2-Piperidinone                          | 0.17           |
| 42.598               | 2,6-piperidinedione                     | 0.28           |
| 44.201               | Unknown                                 | 0.25           |
| 44.419               | Benzenepropanenitrile                   | 0.33           |
| 45.386               | Unknown (possibly dimethyl pyrrolinone) | 0.25           |
| 46.406               | Indole                                  | 2.86           |
| 46.836               | Pyrrole-2-carboxamide                   | 0.5            |
| 47.26                | Unknown                                 | 0.19           |
| 47.975               | Unknown                                 | 1.26           |
| 48.717               | Unknown                                 | 0.64           |
| 50.174               | Unknown                                 | 4.33           |

**Table S1.** Continued

| Retention time (min) | Compounds                                | % of peak area |
|----------------------|------------------------------------------|----------------|
| 51.24                | Unknown                                  | 0.22           |
| 52.426               | Unknown                                  | 1.33           |
| 52.505               | Unknown                                  | 1.27           |
| 52.664               | Unknown                                  | 0.46           |
| 52.889               | Unknown                                  | 0.43           |
| 53.227               | Unknown                                  | 0.39           |
| 53.478               | Unknown                                  | 0.35           |
| 53.69                | N-Methyl-O-methyltyrosine methyl ester   | 0.13           |
| 54.505               | Unknown                                  | 0.42           |
| 54.644               | Unknown                                  | 0.17           |
| 55.081               | Unknown                                  | 0.27           |
| 55.664               | Unknown                                  | 1.48           |
| 55.79                | Unknown                                  | 2.06           |
| 56.048               | Unknown                                  | 1.21           |
| 56.723               | 1-Methyl-3-(N-methylethanamine)-indole   | 0.28           |
| 56.816               | Unknown                                  | 0.26           |
| 58.829               | Unknown                                  | 0.85           |
| 59.213               | Unknown                                  | 0.56           |
| 59.803               | Unknown                                  | 3.42           |
| 60.611               | Unknown                                  | 4.92           |
| 60.816               | Tetraethyl pyrazine                      | 2.62           |
| 61.346               | Unknown                                  | 9.45           |
| 61.882               | Unknown                                  | 1.49           |
| 62.471               | Unknown                                  | 4.42           |
| 63.339               | 3,6-Diisobutylpiperazine-2,5-dione       | 3.29           |
| 64.835               | Unknown                                  | 1.04           |
| 65.352               | Dimer of pyrrolidinedione                | 4.29           |
| 65.451               | Unknown                                  | 3.56           |
| 65.743               | Unknown                                  | 4.54           |
| 65.809               | N-Methyl-N-methyltryptophan methyl ester | 0.65           |
| 66.001               | Hexadecanoic acid                        | 1.65           |
| 67.332               | Unknown                                  | 0.48           |
| 67.875               | Unknown                                  | 0.32           |
| 68.007               | Unknown                                  | 0.39           |
| 68.332               | Unknown                                  | 0.40           |
| 69.769               | Unknown                                  | 0.23           |
| 70.583               | Octadecanoic acid                        | 0.72           |
| 70.915               | Hexadecanamide                           | 0.63           |
| 72.703               | Unknown                                  | 2.84           |
| 74.385               | Unknown                                  | 0.64           |
| 75.312               | Octadecanamide                           | 0.50           |
| 78.172               | 1,2-benzenedicarboxylic acid ester       | 0.46           |
| 84.761               | Sterene                                  | 0.29           |
| 84.861               | Sterene                                  | 1.36           |
| 85.51                | Sterene                                  | 0.55           |

**Table S1.** Continued

| Retention time (min) | Compounds | % of peak area |
|----------------------|-----------|----------------|
| 88.543               | Sterol    | 0.95           |
| 89.178               | Sterol    | 0.29           |

**Table S2.** Retention time and the percentage of peak areas of the pyrolysis products obtained from wool fibre at 400 to 600 °C.

| Retention time (min) | Compounds                                 | % of peak area |
|----------------------|-------------------------------------------|----------------|
| 34.578               | 2-methyl butanenitrile                    | 0.30           |
| 34.896               | 3-methyl butanenitrile                    | 0.99           |
| 35.605               | Pyrrole                                   | 1.65           |
| 36.062               | Toluene                                   | 9.79           |
| 36.479               | Unknown                                   | 0.18           |
| 37.909               | Methyl pyridine                           | 0.59           |
| 38.796               | 2-methyl 1H-pyrrole                       | 0.96           |
| 38.869               | Unknown                                   | 0.27           |
| 38.995               | 4-methyl pentanenitrile                   | 1.00           |
| 39.075               | 3-methyl 1H-pyrrole                       | 0.74           |
| 39.664               | Ethylbenzene                              | 1.25           |
| 40.022               | m-xylene                                  | 0.24           |
| 40.075               | p-xylene                                  | 0.19           |
| 40.326               | Dimethyl thiophene                        | 0.21           |
| 40.882               | Styrene                                   | 1.20           |
| 41.333               | Ethyl pyridine                            | 0.13           |
| 42.081               | Dimethyl 1H-pyrrole                       | 0.31           |
| 42.2                 | Ethyl 1H-pyrrole                          | 0.38           |
| 42.333               | Dimethyl 1H-pyrrole                       | 0.40           |
| 42.611               | Phenylalanine methyl ester                | 0.44           |
| 42.896               | Ethyl 1H-pyrrole                          | 0.18           |
| 43.041               | 3-Methyl-4(-N-methylethanimine)-imidazole | 0.28           |
| 43.101               | Dimethyl 1H-pyrrole                       | 0.24           |
| 44.498               | Phenol                                    | 5.97           |
| 45.048               | Trimethylbenzene                          | 0.10           |
| 45.425               | Ethyl methyl 1H-pyrrole                   | 0.30           |
| 45.756               | Unknown                                   | 0.52           |
| 45.862               | Trimethyl 1H-pyrrole                      | 0.51           |
| 46.107               | Ethyl methyl 1H-pyrrole                   | 0.20           |
| 47.134               | Unknown                                   | 0.17           |
| 47.366               | 2-methylphenol                            | 0.89           |
| 48.014               | 2-Amino-4-methylpyrimidine                | 0.21           |
| 48.365               | 4-methylphenol                            | 10.83          |
| 49.087               | 2-Pyridinamine, 3-methyl-                 | 0.38           |
| 49.551               | Unknown (possibly imethylphenol)          | 0.43           |
| 49.73                | 2-Pyridinamine, 5-methyl-                 | 0.23           |



**Table S2.** Continued.

| Retention time (min) | Compounds                                   | % of peak area |
|----------------------|---------------------------------------------|----------------|
| 49.889               | 2-Pyridinamine, 6-methyl-                   | 0.38           |
| 50.147               | Unknown                                     | 0.25           |
| 50.471               | 2-pyrimidinamine, 4,6-dimethyl-             | 0.43           |
| 50.749               | Benzyl nitrile                              | 0.52           |
| 51.167               | Dimethylphenol                              | 2.53           |
| 51.776               | 2,6-Piperidinedione                         | 1.32           |
| 52.776               | Unknown (possibly 2-Piperidinone)           | 1.13           |
| 54.113               | Unknown                                     | 1.42           |
| 54.464               | Benzenepropanenitrile                       | 0.85           |
| 55.113               | Picolinamide                                | 0.77           |
| 55.266               | 4-Propylphenol                              | 0.25           |
| 55.59                | Unknown                                     | 0.58           |
| 56.491               | Indole                                      | 2.68           |
| 57.279               | Unknown                                     | 0.41           |
| 58.842               | Unknown                                     | 0.48           |
| 59.616               | Methyl indole                               | 1.01           |
| 59.974               | Unknown                                     | 0.68           |
| 60.126               | Unknown                                     | 1.06           |
| 60.285               | Unknown                                     | 1.00           |
| 62.61                | 3,6-Diisobutyl-1-methylpiperazine-2,5-dione | 1.31           |
| 62.775               | Dimer of pyrrolidinedione                   | 0.81           |
| 65.821               | Unknown                                     | 0.89           |
| 65.994               | Unknown                                     | 1.48           |
| 66.199               | N-Methyltryptophan methyl ester             | 2.27           |
| 69.901               | Unknown                                     | 1.52           |
| 70.656               | Unknown                                     | 1.91           |
| 71.271               | Unknown                                     | 2.65           |
| 71.722               | Unknown                                     | 1.77           |
| 72.397               | Unknown                                     | 3.45           |
| 73.285               | Unknown                                     | 0.47           |
| 75.298               | Unknown                                     | 0.56           |
| 75.47                | Unknown                                     | 1.22           |
| 75.655               | Unknown                                     | 1.06           |
| 76.662               | Unknown                                     | 1.93           |
| 80.417               | Unknown                                     | 0.89           |
| 83.224               | Unknown                                     | 5.61           |
| 85.357               | Unknown                                     | 0.53           |
| 94.846               | Sterene                                     | 0.24           |
| 98.555               | Sterol                                      | 0.15           |
